# Supplementary material
Source: PubMed Central journal article supplement (PMC5880233)
Supplement: EHP1390.s001.acco.pdf [file EHP1390.s001.acco.pdf]

**Note to readers with disabilities:** *EHP* strives to ensure that all journal content is accessible to all readers. However, some figures and Supplemental Material published in *EHP* articles may not conform to [508 standards](#) due to the complexity of the information being presented. If you need assistance accessing journal content, please contact [ehp508@niehs.nih.gov](mailto:ehp508@niehs.nih.gov). Our staff will work with you to assess and meet your accessibility needs within 3 working days.

### **Supplemental Material**

#### **Updated global estimates of respiratory mortality in adults $\geq 30$ years of age attributable to long-term ozone exposure**

Christopher S. Malley, Daven K. Henze, Johan C.I. Kuylenstierna, Harry W. Vallack, Yanko Davila, Susan C. Anenberg, Michelle C. Turner, and Mike R. Ashmore

#### **Table of Contents**

**Table S1.** Comparison of the characteristics of the Jerrett et al. (2009) and Turner et al. (2016) analyses of the American Cancer Society Cancer Prevention Study-II cohort population.

**Table S2.** Global and regional estimates of long-term O<sub>3</sub> attributable respiratory deaths for adults  $\geq 30$  years of age only. Estimates were calculated using relationships between long-term O<sub>3</sub> exposure and respiratory mortality derived in Turner et al. (2016) using a multi-pollutant model (adjusting for near-source PM<sub>2.5</sub>, regional PM<sub>2.5</sub>, and NO<sub>2</sub> concentrations), and a single-pollutant model (no adjustment for other pollutants). Values in brackets are 95% confidence intervals.

**Table S3.** Summary of global estimates of long-term O<sub>3</sub> attributable respiratory deaths calculated using the J2009 relative risk estimates. Estimates from previous studies (from the Global Burden of Disease (GBD) project and other studies), and those derived in this study using comparable metrics, low concentration cut-offs and Hazard Ratios are shown. Values in brackets are 95% confidence intervals.

**Table S4.** Global and regional estimates of long-term O<sub>3</sub>-attributable annual COPD deaths for adults  $\geq 30$  years of age only derived using relative risk estimates from Turner et al. (2016). Estimates are also expressed as a proportion of all COPD deaths for the population equal to or over 30 years old in each region. Values in brackets are 95% confidence intervals.

**Figure S1.** Children's GEOS-Chem-derived global gridded long term O<sub>3</sub> exposure estimates. Shown are long-term O<sub>3</sub> exposure concentrations calculated as a) maximum 6-month average daily max 1h concentration (6mDMA1, relevant for J2009 relative risk estimates), b) annual average daily max 8h concentrations (ADMA8, relevant for T2016 relative risk estimates) (Map Data: © EuroGeographics for the administrative boundaries).

**Figure S2.** Estimated long-term O<sub>3</sub> exposure attributable respiratory deaths in 2010 for adults ≥30 years of age. Units are attributable deaths per 100,000 people, and estimates were derived using the J2009 relative risk estimates, with a low concentration cut-off set at the minimum exposure in the ACS CPS-II cohort (33.3 ppb, 6-month daily maximum 1h O<sub>3</sub> concentration) (Map Data: © EuroGeographics for the administrative boundaries).

**Figure S3.** Estimated long-term O<sub>3</sub> exposure attributable chronic obstructive pulmonary disease (COPD) deaths in 2010 for adults ≥30 years of age. Units are attributable deaths per 100,000 people, and estimates were derived using the T2016 relative risk estimate, with a low concentration cut-off set at the minimum exposure in the ACS CPS-II cohort (26.7 ppb, annual average daily maximum 8h O<sub>3</sub> concentration) (Map Data: © EuroGeographics for the administrative boundaries).

## References

**Table S1:** Comparison of the characteristics of the Jerrett et al. (2009) and Turner et al. (2016) analyses of the American Cancer Society Cancer Prevention Study-II cohort population.

| Characteristic                                                     | Jerret et al. (2009)                                                                                                    | Turner et al. (2016)                                                                                                                       |
|--------------------------------------------------------------------|-------------------------------------------------------------------------------------------------------------------------|--------------------------------------------------------------------------------------------------------------------------------------------|
| Total population size                                              | 448,850                                                                                                                 | 669,046                                                                                                                                    |
| Follow-up period                                                   | 1982-2000                                                                                                               | 1982-2004                                                                                                                                  |
| Total deaths during follow-up                                      | 118,777                                                                                                                 | 237,201                                                                                                                                    |
| Geographic region                                                  | 96 U.S. metropolitan statistical areas                                                                                  | Contiguous United States                                                                                                                   |
| Ozone metric <sup>a</sup>                                          | Six month summer average daily maximum 1h concentration (average between April-June and July-September values) (6mDM1h) | Annual average daily maximum 8h concentration (ADM8h)                                                                                      |
| Ozone data source                                                  | Ozone monitoring data: average of all monitors in each metropolitan area                                                | US EPA hierarchical Bayesian space-time model: Combination of ambient monitoring data with gridded (36 x 36 km) photochemical model output |
| Ozone exposure spatial variation                                   | 33.3-104.0 ppb (6mDM1h)                                                                                                 | 26.7-59.3 ppb (ADM8h)                                                                                                                      |
| Ozone exposure period <sup>b</sup>                                 | 1977-2000                                                                                                               | 2002-2004 <sup>c</sup>                                                                                                                     |
| Pollutants controlled for in multi-pollutant models                | PM <sub>2.5</sub> (Annual average 1999-2000)                                                                            | PM <sub>2.5</sub> decomposed into near-source and regional components (Annual average 1999-2004)                                           |
|                                                                    |                                                                                                                         | NO <sub>2</sub> (Annual average 2006)                                                                                                      |
| Correlation between ozone and PM <sub>2.5</sub> exposure estimates | $r = 0.64$                                                                                                              | 'near-source' PM <sub>2.5</sub> $r = -0.13$<br>'regional' PM <sub>2.5</sub> $r = 0.23$                                                     |

<sup>a</sup> Correlation between the metrics used in Turner et al. (2016) and Jerrett et al. (2009) was 'moderately strong ( $r = 0.70$ )' (Turner et al. 2016).

<sup>b</sup> The time periods used to characterise long-term exposure to the pollutants are more similar in Turner et al. (2016) compared to Jerrett et al. (2009). The latter assessed O<sub>3</sub> exposure over 23 years, but PM<sub>2.5</sub> concentrations during 2 years at the end of the follow-up period. Hence changes in O<sub>3</sub> concentrations over the 23 years were accounted for in Jerrett et al. (2009), but changes that occurred in PM<sub>2.5</sub> concentrations were not.

<sup>c</sup> While estimation of long-term O<sub>3</sub> exposure at the end of the follow-up allowed for inclusion of a larger population, it did not capture changes in exposure occurring over the follow-up period which coincided with large reductions in O<sub>3</sub> precursor emissions in the US (Simon et al. 2015). Jerrett et al. (2009) assessed the magnitude of the relationship between mortality and long-term O<sub>3</sub> exposure at the start, end, and throughout the follow-up period, and estimated no significant change in the magnitude of the effect. Ozone concentrations in each of these periods in Jerrett et al. (2009) were also correlated (the correlation between O<sub>3</sub> concentrations in 1978-1980 and 1998-2000 was 0.58, and in 1988-1990 and 1998-2000 was 0.80).

**Table S2.** Global and regional estimates of long-term O<sub>3</sub> attributable respiratory deaths for adults ≥30 years of age only. Estimates were calculated using relationships between long-term O<sub>3</sub> exposure and respiratory mortality derived in Turner et al. (2016) using a multi-pollutant model (adjusting for near-source PM<sub>2.5</sub>, regional PM<sub>2.5</sub>, and NO<sub>2</sub> concentrations), and a single-pollutant model (no adjustment for other pollutants). Values in brackets are 95% confidence intervals.

| <b>Region</b>                   | <b>Low Concentration Cut-off<sup>a</sup></b> | <b>Attributable respiratory deaths T2016: 3 pollutant model (thousands)<sup>b</sup></b> | <b>Attributable respiratory deaths T2016: single pollutant model (thousands)<sup>c</sup></b> |
|---------------------------------|----------------------------------------------|-----------------------------------------------------------------------------------------|----------------------------------------------------------------------------------------------|
| Asia                            | 26.7 ppb<br>31.1 ppb                         | 970 (686-1,253)<br>844 (593-1,095)                                                      | 1,092 (817-1,367)<br>953 (709-1,198)                                                         |
| China                           | 26.7 ppb<br>31.1 ppb                         | 316 (230-403)<br>274 (198-351)                                                          | 357 (275-439)<br>311 (238-383)                                                               |
| India                           | 26.7 ppb<br>31.1 ppb                         | 450 (329-572)<br>402 (291-513)                                                          | 506 (391-621)<br>453 (347-559)                                                               |
| Europe                          | 26.7 ppb<br>31.1 ppb                         | 78.9 (54.2-104)<br>55.9 (38.1-73.8)                                                     | 90.0 (65.5-114)<br>64.0 (46.2-81.7)                                                          |
| Africa                          | 26.7 ppb<br>31.1 ppb                         | 80.6 (37.1-124)<br>59.6 (27.5-91.6)                                                     | 91.8 (44.5-139)<br>68.0 (33.1-103)                                                           |
| Latin America and the Caribbean | 26.7 ppb<br>31.1 ppb                         | 39.9 (27.4-52.4)<br>27.2 (18.6-35.7)                                                    | 45.4 (33.1-57.8)<br>31.0 (22.6-39.5)                                                         |
| North America                   | 26.7 ppb<br>31.1 ppb                         | 63.8 (46.3-81.3)<br>53.5 (38.4-68.5)                                                    | 72.3 (55.7-88.9)<br>60.7 (46.4-75.1)                                                         |
| Oceania                         | 26.7 ppb<br>31.1 ppb                         | 1.0 (0.7-1.3)<br>0.4 (0.3-0.6)                                                          | 1.2 (0.8-1.5)<br>0.5 (0.3-0.6)                                                               |
| Global                          | 26.7 ppb<br>31.1 ppb                         | 1,234 (851-1,616)<br>1,040 (716-1,365)                                                  | 1,393 (1,016-1,769)<br>1,178 (858-1,497)                                                     |

<sup>a</sup> Lower value is the minimum ozone concentration (annual daily maximum 8h concentration), and the upper value is the 5th percentile of the ozone concentration, for the population used to derive the T2016 relative risk estimates.

<sup>b</sup> T2016 estimates use HR = 1.12 (95% CI: 1.08, 1.16) as the relative risk estimate derived from a multi-pollutant model that did adjust for near-source and regional PM<sub>2.5</sub> exposure, and NO<sub>2</sub> exposure, and the annual daily 8h maximum ozone concentration as the exposure metric (Turner et al. 2016).

<sup>c</sup> T2016 estimates use HR = 1.14 (95% CI: 1.10, 1.18) as the relative risk estimate derived from a single pollutant model that did not adjust for PM<sub>2.5</sub> and NO<sub>2</sub> exposure, and the annual daily 8h maximum ozone concentration as the exposure metric (Turner et al. 2016).

**Table S3.** Summary of global estimates of long-term O<sub>3</sub> attributable respiratory deaths calculated using the J2009 relative risk estimates. Estimates from previous studies (from the Global Burden of Disease (GBD) project and other studies), and those derived in this study using comparable metrics, low concentration cut-offs and Hazard Ratios are shown. Values in brackets are 95% confidence intervals.

| Health impact study                  | Year of estimate | Ozone model     | Model grid resolution                                            | Low concentration cut-off (ppb)  | Hazard Ratio (10 ppb change in O <sub>3</sub> ) | Metric                            | Disease Category | Attributable deaths (thousands) |
|--------------------------------------|------------------|-----------------|------------------------------------------------------------------|----------------------------------|-------------------------------------------------|-----------------------------------|------------------|---------------------------------|
| Lim et al. (2012) (GBD 2010)         | 2010             | TM5             | 1° × 1°                                                          | 33.3-41.9 (uniform distribution) | 1.029 (1.010-1.048) <sup>a</sup>                | Max 3-m daily max 1h <sup>b</sup> | COPD             | 152 (52-267)                    |
| Forouzanfar et al. (2015) (GBD 2013) | 2013             | TM5-FASST       | 1° × 1°                                                          | 33.3-41.9 (uniform distribution) | 1.029 (1.010-1.048) <sup>a</sup>                | Max 3-m daily max 1h <sup>b</sup> | COPD             | 217 (161-272)                   |
| Forouzanfar et al. (2016) (GBD 2015) | 2015             | TM5-FASST       | 1° × 1°                                                          | 33.3-41.9 (uniform distribution) | 1.029 (1.010-1.048) <sup>a</sup>                | Max 3-m daily max 1h <sup>b</sup> | COPD             | 254 (97-422)                    |
| Anenberg et al. (2010)               | 2000             | MOZART-2        | 2.8° × 2.8°                                                      | 33.3                             | 1.040 (1.013-1.067)                             | Max 6-m daily max 1h              | Resp.            | 470 ± 288 (Mean ± 1 S.D.)       |
| Fang et al. (2013)                   | 2000             | GFDL-AM3        | Cubed sphere grid (163 km at corners and 231 km at centre)       | Preindustrial                    | 1.040 (1.013-1.067)                             | Max 6-m daily max 1h              | Resp.            | 375 (129-592)                   |
| Silva et al. (2013)                  | 2000             | ACCMIP ensemble | Model's native resolution ranged between 1.9° × 1.2° and 5° × 5° | Preindustrial                    | 1.040 (1.013-1.067)                             | Max 6-m daily max 1h              | Resp.            | 470 (140-900)                   |
| Silva et al. (2016)                  | 2005             | MOZART-4        | 0.67° × 0.5°                                                     | Preindustrial                    | 1.040 (1.013-1.067)                             | Max 6-m daily max 1h              | Resp.            | 493 (122-989)                   |
| This study                           | 2010             | GEOS-Chem       | 2° × 2.5°                                                        | 33.3                             | 1.029 (1.010-1.048) <sup>a</sup>                | Max 3-m daily max 1h <sup>b</sup> | COPD             | 294 (120-468)                   |
| This study                           | 2010             | GEOS-Chem       | 2° × 2.5°                                                        | 41.9                             | 1.029 (1.010-1.048) <sup>a</sup>                | Max 3-m daily max 1h <sup>b</sup> | COPD             | 230 (92.4-368)                  |
| This study                           | 2010             | GEOS-Chem       | 2° × 2.5°                                                        | 33.3                             | 1.040 (1.013-1.067)                             | Max 6-m daily max 1h              | Resp.            | 547 (198-897)                   |
| This study                           | 2010             | GEOS-Chem       | 2° × 2.5°                                                        | 41.9                             | 1.040 (1.013-1.067)                             | Max 6-m daily max 1h              | Resp.            | 398 (142-654)                   |

<sup>a</sup> Relative risk estimates derived from single-pollutant model in Jerrett et al. (2009) for the association between O<sub>3</sub> exposure and total respiratory mortality. The Global Burden of Disease (GBD) studies have applied this relative risk estimate to long-term O<sub>3</sub>-attributable COPD deaths specifically. We provide estimates of long-term O<sub>3</sub>-attributable COPD deaths using this relative risk estimate for comparison with these previous estimates (Forouzanfar et al. 2015, 2016; Lim et al. 2012).

<sup>b</sup> Jerrett et al. (2009) estimated O<sub>3</sub> exposure among the ACS CPS-II cohort as the 6-month average daily maximum 1h O<sub>3</sub> concentration (average of Apr-Jun and Jul-Sep values), but GBD studies have applied the J2009 relative risk estimates with maximum 3-month daily maximum 1h O<sub>3</sub> concentrations. We provide estimates of long-term O<sub>3</sub>-attributable COPD deaths using this O<sub>3</sub> exposure metric for comparison with these previous estimates.

**Table S4.** Global and regional estimates of long-term O<sub>3</sub>-attributable annual COPD deaths for adults ≥30 years of age only derived using relative risk estimates from Turner et al. (2016). Estimates are also expressed as a proportion of all COPD deaths for the population equal to or over 30 years old in each region. Values in brackets are 95% confidence intervals.

| <b>Region</b>                   | <b>Low Concentration Cut-off<sup>a</sup></b> | <b>Attributable COPD deaths T2016<sup>b</sup> (thousands)</b> | <b>Proportion of total COPD deaths (T2016 estimates, %)</b> |
|---------------------------------|----------------------------------------------|---------------------------------------------------------------|-------------------------------------------------------------|
| Asia                            | 26.7 ppb                                     | 726 (458-994)                                                 | 32.5 (20.1-43.9)                                            |
|                                 | 31.1 ppb                                     | 637 (396-877)                                                 | 28.5 (17.6-39.7)                                            |
| China                           | 26.7 ppb                                     | 290 (186-394)                                                 | 31.5 (19.7-42.8)                                            |
|                                 | 31.1 ppb                                     | 252 (159-345)                                                 | 27.4 (17.8-37.7)                                            |
| India                           | 26.7 ppb                                     | 335 (218-452)                                                 | 36.1 (23.6-50.0)                                            |
|                                 | 31.1 ppb                                     | 300 (192-407)                                                 | 32.4 (20.5-44.9)                                            |
| Europe                          | 26.7 ppb                                     | 46.8 (27.9-65.7)                                              | 17.5 (10.3-24.3)                                            |
|                                 | 31.1 ppb                                     | 33.7 (19.8-47.6)                                              | 12.6 (7.1-17.8)                                             |
| Africa                          | 26.7 ppb                                     | 21.3 (9.1-33.5)                                               | 19.7 (8.6-31.5)                                             |
|                                 | 31.1 ppb                                     | 16.3 (7.0-25.6)                                               | 15.1 (6.5-23.8)                                             |
| Latin America and the Caribbean | 26.7 ppb                                     | 20.1 (12.2-28.1)                                              | 14.3 (8.8-19.9)                                             |
|                                 | 31.1 ppb                                     | 14.0 (8.5-19.6)                                               | 10.0 (6.0-13.7)                                             |
| North America                   | 26.7 ppb                                     | 41.0 (25.9-56.2)                                              | 27.1 (16.7-37.6)                                            |
|                                 | 31.1 ppb                                     | 34.5 (21.4-47.6)                                              | 22.8 (14.6-31.4)                                            |
| Oceania                         | 26.7 ppb                                     | 0.7 (0.4-1.0)                                                 | 4.7 (2.7-7.1)                                               |
|                                 | 31.1 ppb                                     | 0.3 (0.2-0.4)                                                 | 1.9 (1.1-2.9)                                               |
| Global                          | 26.7 ppb                                     | 856 (534-1,178)                                               | 29.3 (18.2-40.5)                                            |
|                                 | 31.1 ppb                                     | 736 (453-1,018)                                               | 25.2 (16.2-34.6)                                            |

<sup>a</sup> Lower value is the minimum ozone concentration (annual daily maximum 8h concentration), and the upper value is the 5th percentile of the ozone concentration, for the population used to derive the T2016 relative risk estimates.

<sup>b</sup> T2016 estimates use HR = 1.14 (95% CI: 1.08, 1.21) as the relative risk estimate and the annual daily 8h maximum ozone concentration as the exposure metric (Turner et al. 2016).

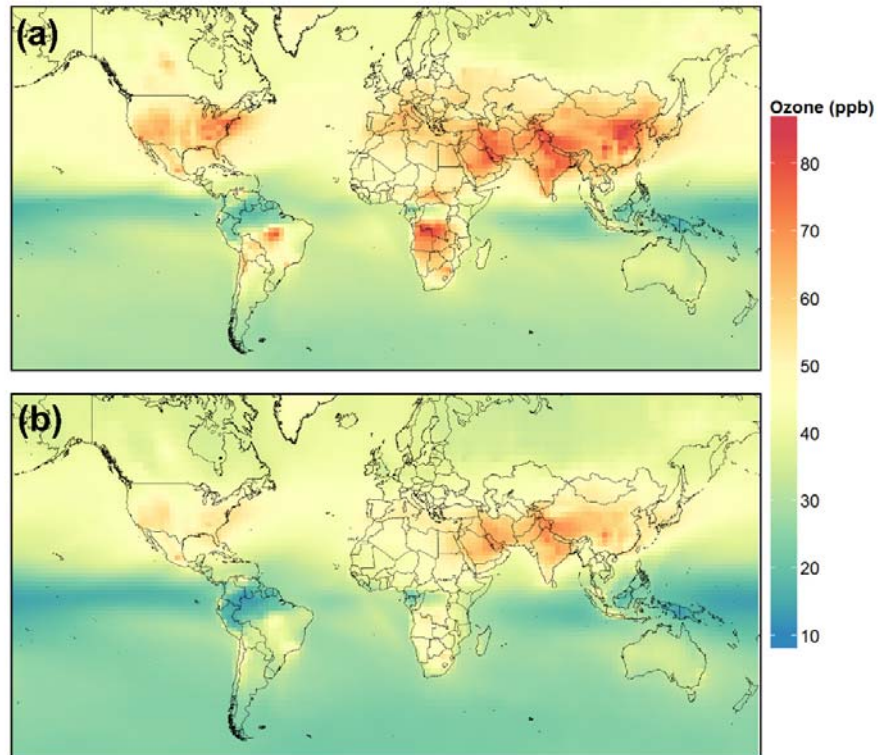

**Figure S1.** GEOS-Chem-derived global gridded long term O<sub>3</sub> exposure estimates. Long-term O<sub>3</sub> exposures are calculated as a) maximum 6-month average daily max 1h concentration (6mDMA1, relevant for J2009 relative risk estimates), b) annual average daily max 8h concentrations (ADMA8, relevant for T2016 relative risk estimates) (Map Data: © EuroGeographics for the administrative boundaries).

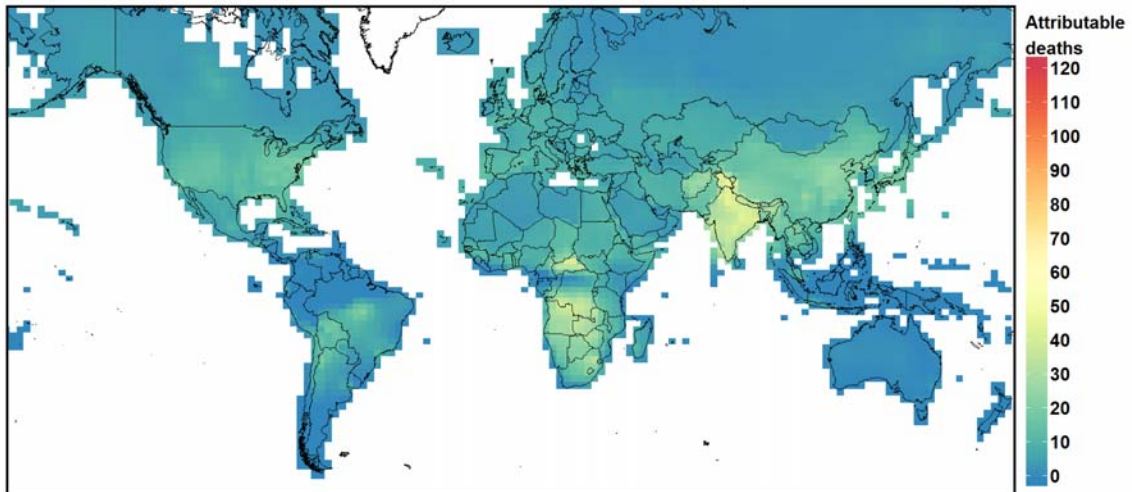

**Figure S2.** Estimated long-term O<sub>3</sub> exposure attributable respiratory deaths in 2010 for adults  $\geq 30$  years of age. Units are attributable deaths per 100,000 people, and estimates were derived using the J2009 relative risk estimates, with a low concentration cut-off set at the minimum exposure in the ACS CPS-II cohort (33.3 ppb, 6-month daily maximum 1h O<sub>3</sub> concentration) (Map Data: © EuroGeographics for the administrative boundaries).



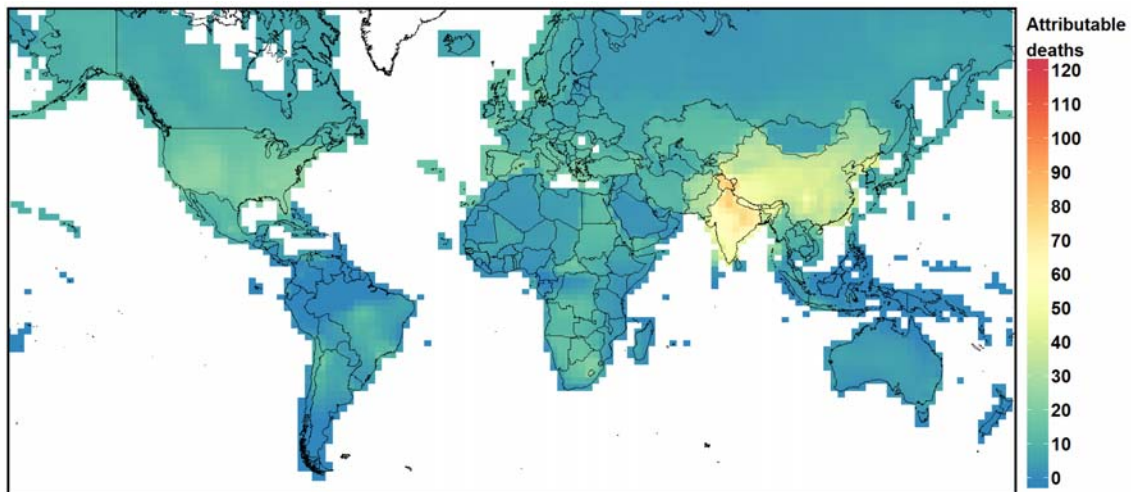

**Figure S3.** Estimated long-term O<sub>3</sub> exposure attributable chronic obstructive pulmonary disease (COPD) deaths in 2010 for adults  $\geq 30$  years of age. Units are attributable deaths per 100,000 people, and estimates were derived using the T2016 relative risk estimate, with a low concentration cut-off set at the minimum exposure in the ACS CPS-II cohort (26.7 ppb, annual average daily maximum 8h O<sub>3</sub> concentration) (Map Data: © EuroGeographics for the administrative boundaries).

## References

- Anenberg SC, Horowitz LW, Tong DQ, West JJ. 2010. An Estimate of the Global Burden of Anthropogenic Ozone and Fine Particulate Matter on Premature Human Mortality Using Atmospheric Modeling. *Environ. Health Perspect.* 118:1189–1195; doi:10.1289/ehp.0901220.
- Fang Y, Naik V, Horowitz LW, Mauzerall DL. 2013. Air pollution and associated human mortality: the role of air pollutant emissions, climate change and methane concentration increases from the preindustrial period to present. *Atmos. Chem. Phys.* 13:1377–1394; doi:10.5194/acp-13-1377-2013.
- Forouzanfar MH, Afshin A, Alexander LT, Anderson HR, Bhutta ZA, Biryukov S, et al. 2016. Global, regional, and national comparative risk assessment of 79 behavioural, environmental and occupational, and metabolic risks or clusters of risks, 1990–2013: a systematic analysis for the Global Burden of Disease Study 2015. *Lancet* 388:1659–1724; doi:10.1016/S0140-6736(16)31679-8.
- Forouzanfar MH, Alexander L, Anderson HR, Bachman VF, Biryukov S, Brauer M, et al. 2015. Global, regional, and national comparative risk assessment of 79 behavioural, environmental and occupational, and metabolic risks or clusters of risks in 188 countries, 1990–2013: a systematic analysis for the Global Burden of Disease Study 2013. *Lancet* 386:2287–2323; doi:10.1016/s0140-6736(15)00128-2.
- Jerrett M, Burnett RT, Pope C, Arden II, Ito K, Thurston G, Krewski D, et al. 2009. Long-Term Ozone Exposure and Mortality. *N. Engl. J. Med.* 360:1085–1095; doi:10.1056/NEJMoa0803894.
- Lim SS, Vos T, Flaxman AD, Danaei G, Shibuya K, Adair-Rohani H, et al. 2012. A comparative risk assessment of burden of disease and injury attributable to 67 risk factors and risk factor clusters in 21 regions, 1990–2010: a systematic analysis for the Global Burden of Disease Study 2010. *Lancet* 380: 2224–2260.
- Silva RA, Adelman Z, Fry MM, West JJ. 2016. The Impact of Individual Anthropogenic Emissions Sectors on the Global Burden of Human Mortality due to Ambient Air Pollution. *Environ. Heal. Persp.*; doi:10.1289/EHP177.
- Silva RA, West JJ, Zhang YQ, Anenberg SC, Lamarque JF, Shindell DT, et al. 2013. Global premature mortality due to anthropogenic outdoor air pollution and the contribution of past climate change. *Environ. Res. Lett.* 8:11; doi:10.1088/1748-9326/8/3/034005.
- Simon H, Reff A, Wells B, Xing J, Frank N. 2015. Ozone Trends Across the United States over a Period of Decreasing NO<sub>x</sub> and VOC Emissions. *Environ. Sci. Technol.* 49:186–195; doi:10.1021/es504514z.
- Turner MC, Jerrett M, Pope III CA, Krewski D, Gapstur SM, Diver WR, et al. 2016. Long-Term Ozone Exposure and Mortality in a Large Prospective Study. *Am. J. Respir. Crit. Care Med.* 193:1134–1142; doi:10.1164/rccm.201508-1633OC.
